# Supplementary material for: Bilayer dressing based on aerogel/electrospun mats with self-catalytic hydrogen sulfide generation and enhanced antioxidant ability
Source: Royal Society of Chemistry journal article supplement (doi:10.1039/d2tb02090d), 2022-12-28
Supplement: d2tb02090d1.pdf [file d2tb02090d1.pdf]

**Supplementary Information**

**Bilayer dressing based on aerogel/electrospun mats with self-catalytic hydrogen sulfide  
generation and enhanced antioxidant ability**

Xiao Han<sup>1</sup>, Lijuan Wang<sup>1</sup>, Yushang Shang<sup>1</sup>, Xu Liu<sup>1</sup>, Inn-kyu Kang<sup>3</sup>, Jian Shen<sup>\*,1,2</sup>, Jiang Yuan<sup>\*,1</sup>

<sup>1</sup>National and Local Joint Engineering Research Center of Biomedical Functional Materials,  
School of Chemistry and Materials Science, Nanjing Normal University, Nanjing 210023, P. R.  
China

<sup>2</sup>Jiangsu Engineering Research Center of Interfacial Chemistry, Nanjing University, Nanjing  
210023, P. R. China

<sup>3</sup>Department of Polymer Science and Engineering, Kyungpook National University, Daegu 702-  
701, Republic of Korea

\*Corresponding authors: bioalchem@yahoo.com(J. Yuan), jshen@njnu.edu.cn(J. Shen)

### 1. UV-Vis spectra of keratin and KTC

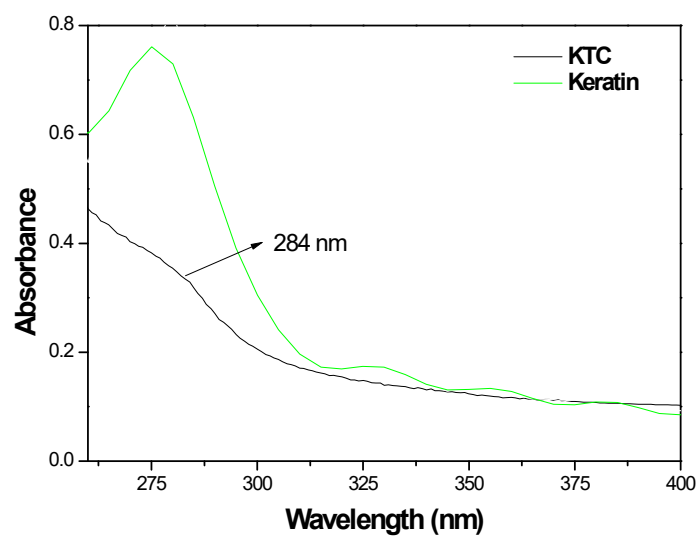

Fig.S1 UV-Vis spectra of keratin and KTC

### 2. H-NMR of keratin and KTC

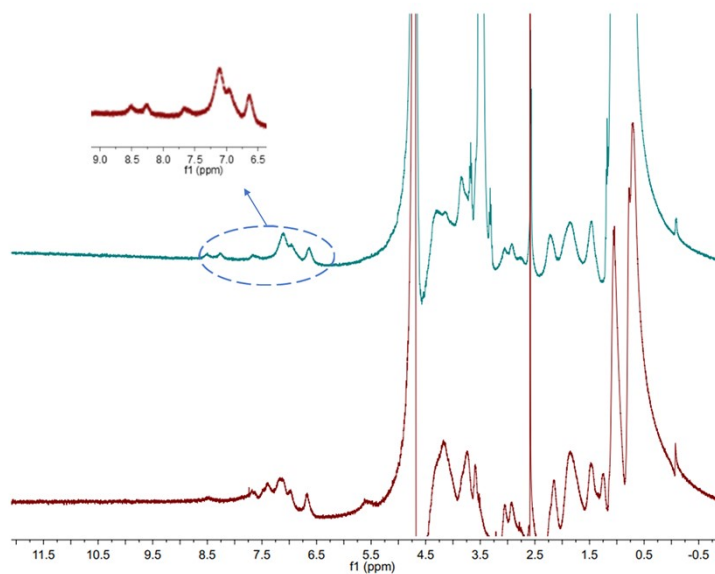

Fig.S2 H-NMR of keratin(lower) and KTC(upper)

### 3. H-NMR spectrum of GelMA

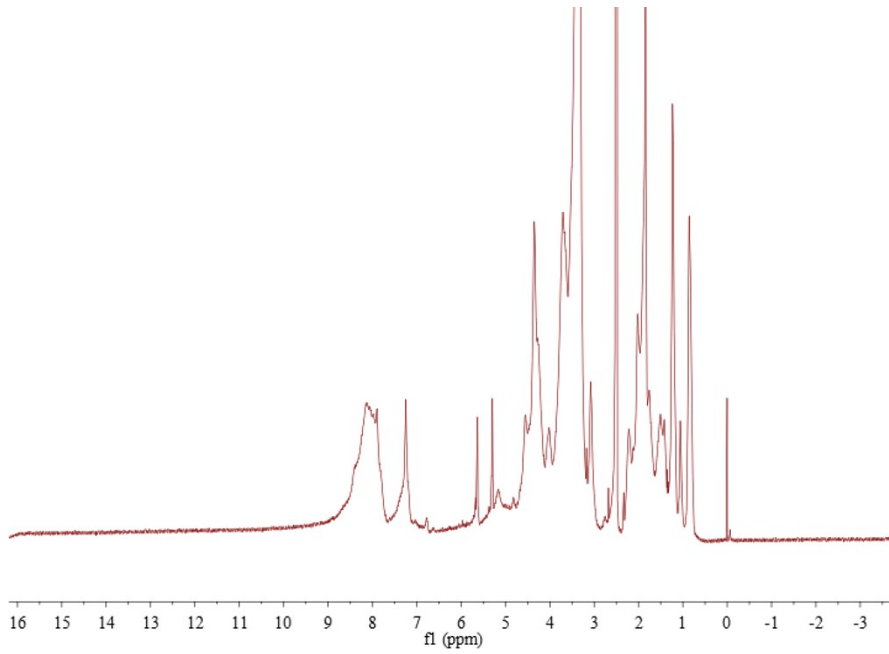

Fig.S3 The H-NMR spectra of GelMA

#### 4. Water vapor transmission

Table S1 Water vapor transmission profile for control and PU/GSH layer.

| Samples      | Water Vapor Transmission Rate (mL/m <sup>2</sup> /day) |
|--------------|--------------------------------------------------------|
| Control      | 1369.4 ± 94.2                                          |
| PU/GSH layer | 1264.3 ± 80.3                                          |

#### 5. H&E staining

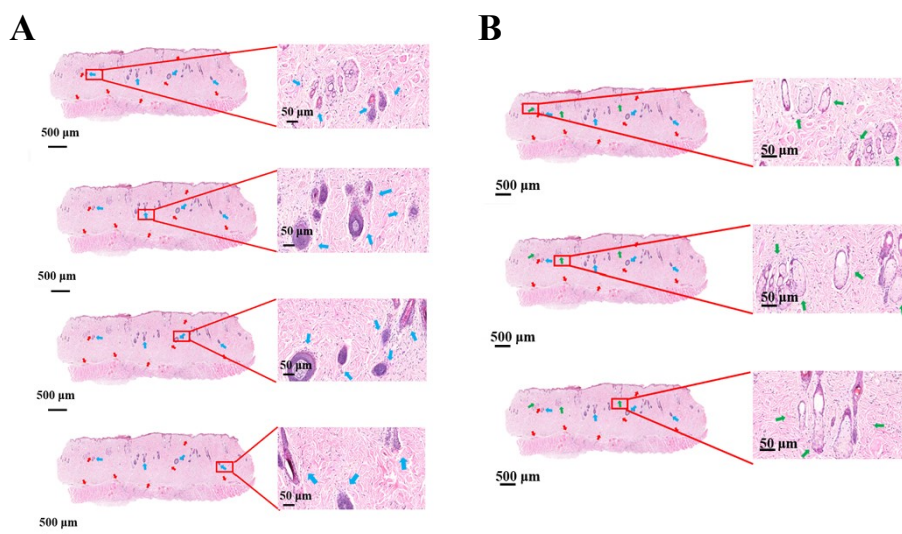

Fig.S4 The newborn hair follicles (A) and the newborn sebaceous glands (B) in the ulcer bed as treated with PU/GSH//GelMA/KTC bilayer dressing for 15 days (blue arrows indicated hair follicles and green arrows indicated sebaceous glands, respectively).
